# Supplementary material for: Genetic diversity of male and female Chinese bayberry (Myrica rubra) populations and identification of sex-associated markers
Source: PubMed Central journal article supplement (PMC4436740; doi:10.1186/s12864-015-1602-5), 2015-05-19

0.1

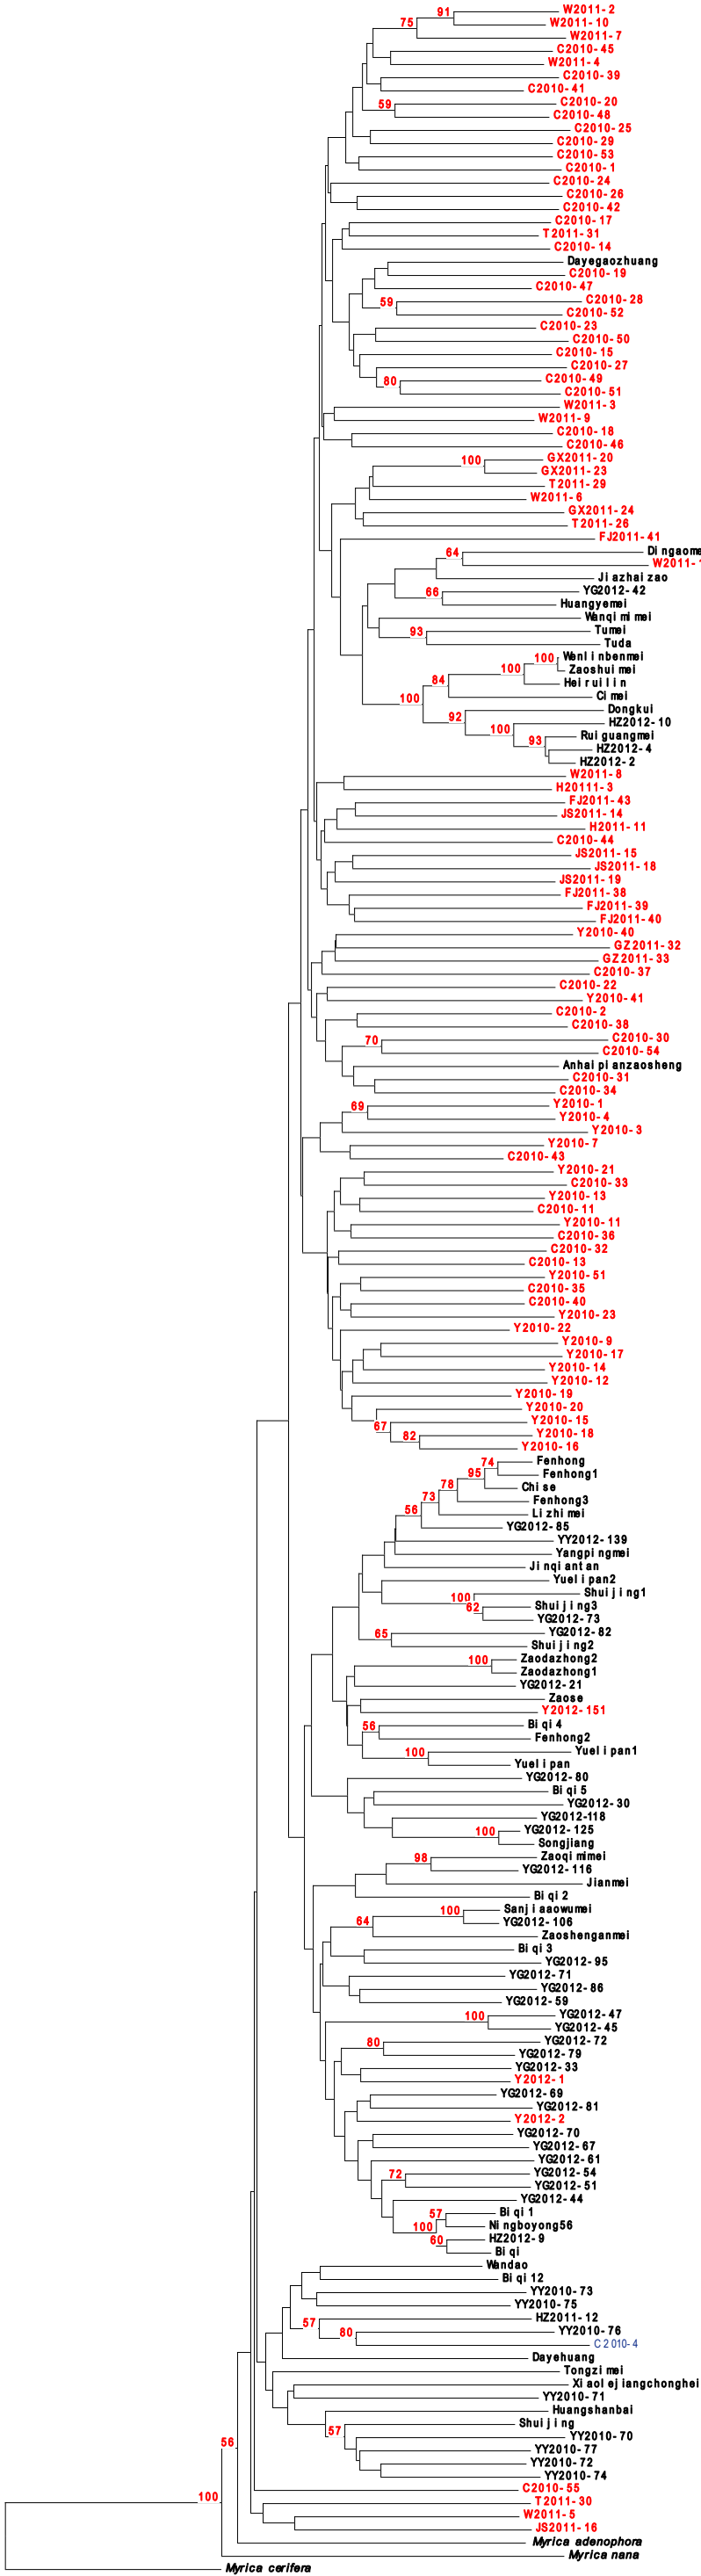

Supplement: 12864_2015_1602_MOESM6_ESM.pdf [file 12864_2015_1602_MOESM6_ESM.pdf]
